# Supplementary material
Source: PubMed Central journal article supplement (PMC10363217)

Male

Female

Blockade of P2X7

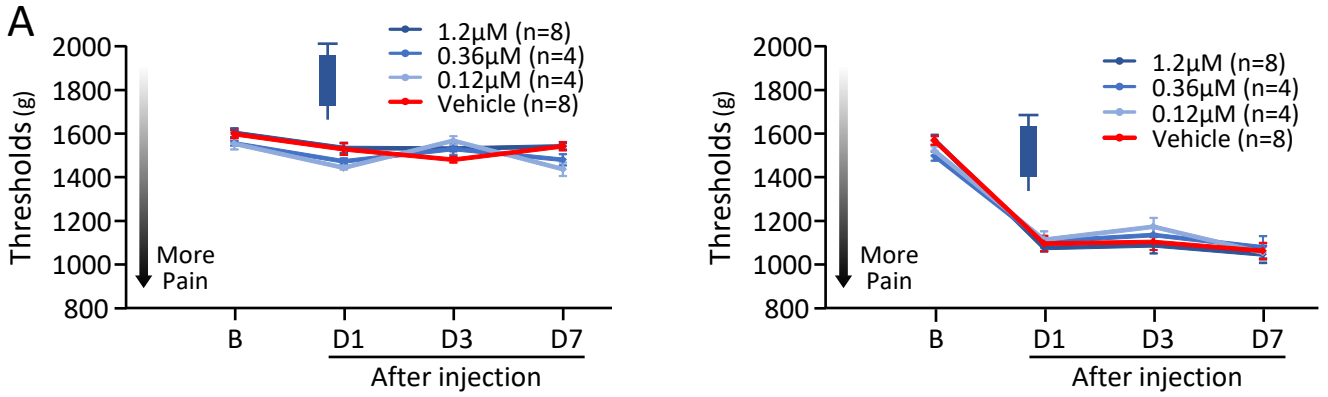

Blockade of NLRP3

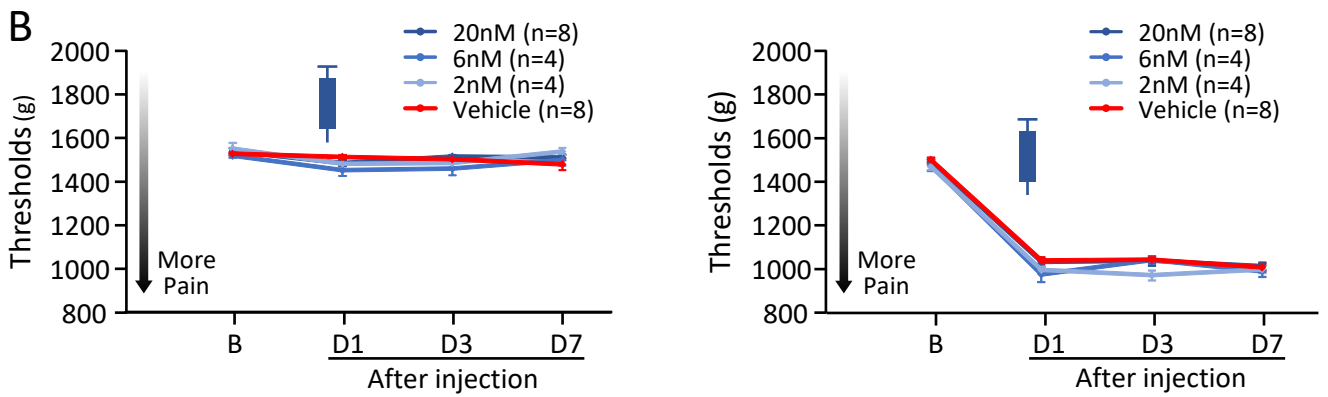

Blockade of Caspase-1

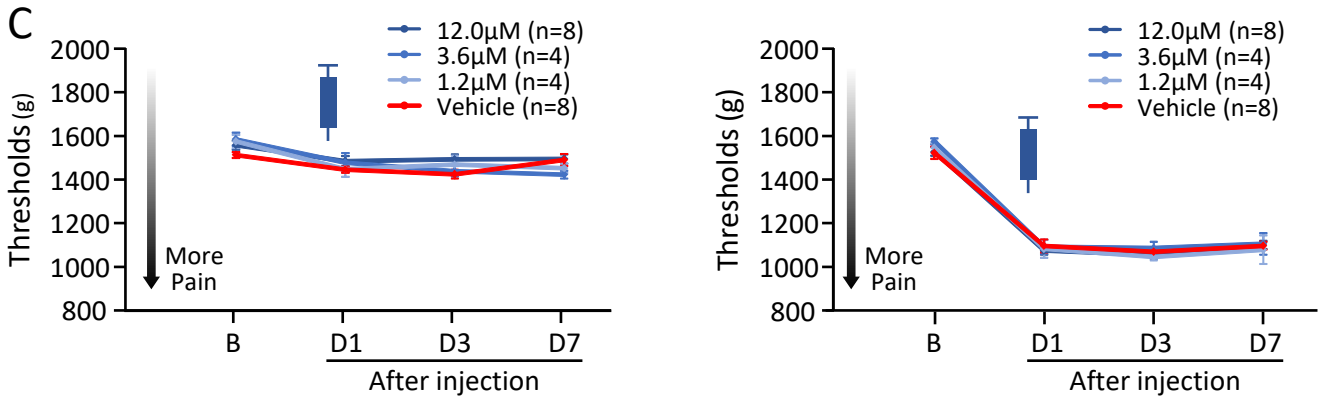

Blockade of IL-1 $\beta$

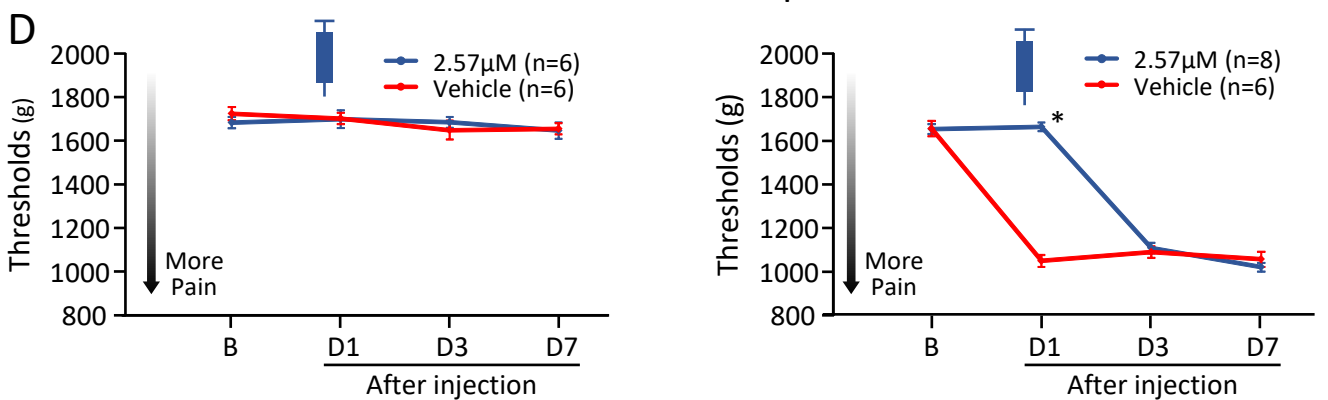

Male

Female

Blockade of P2X7

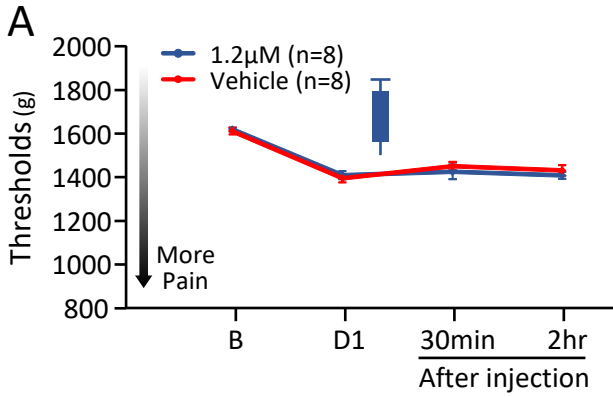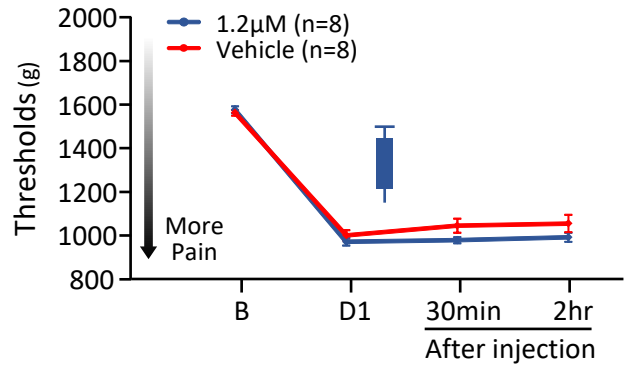

Blockade of NLRP3

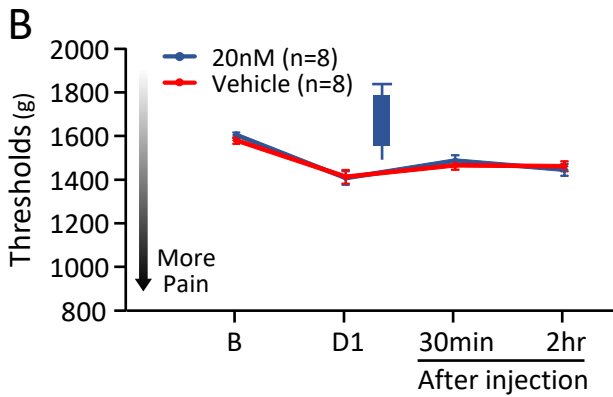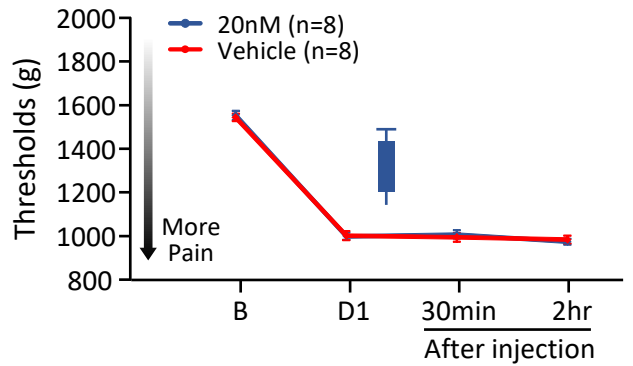

Blockade of Caspase-1

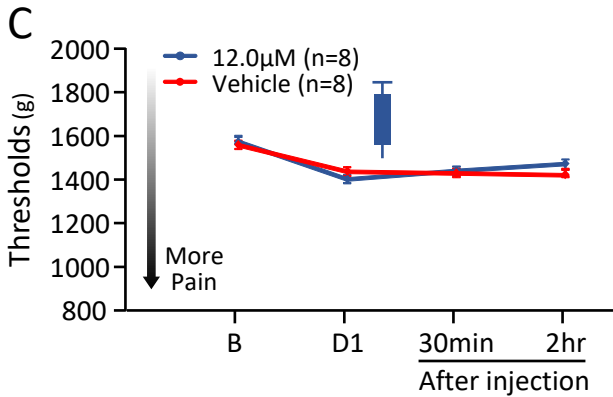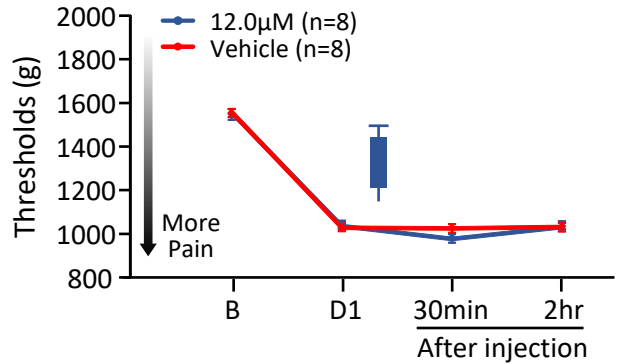

Blockade of IL-1β

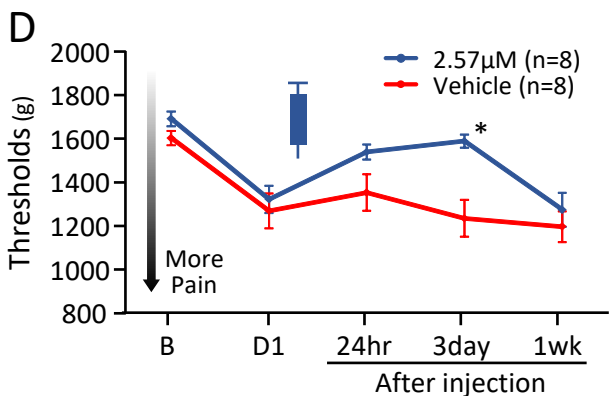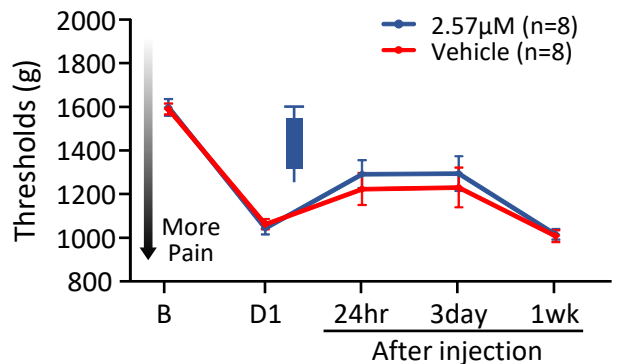

Male

Female

Blockade of P2X7

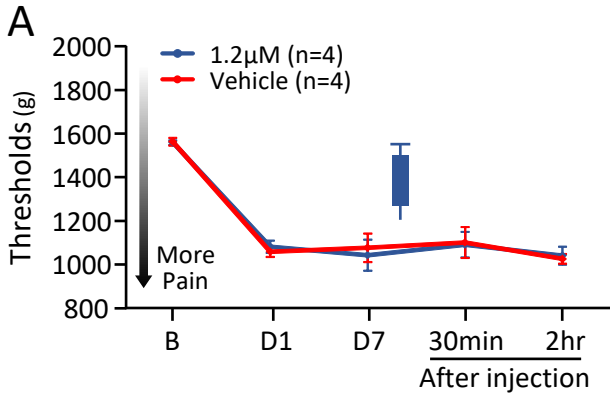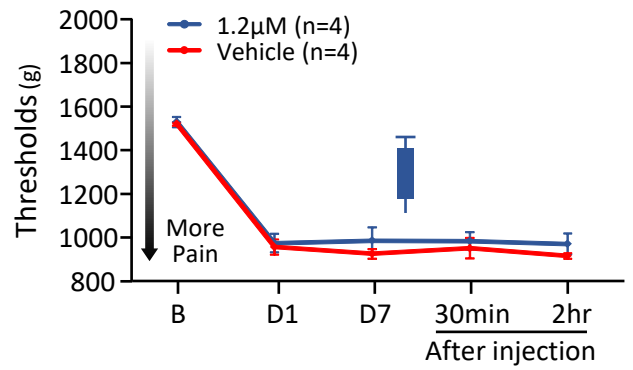

Blockade of NLRP3

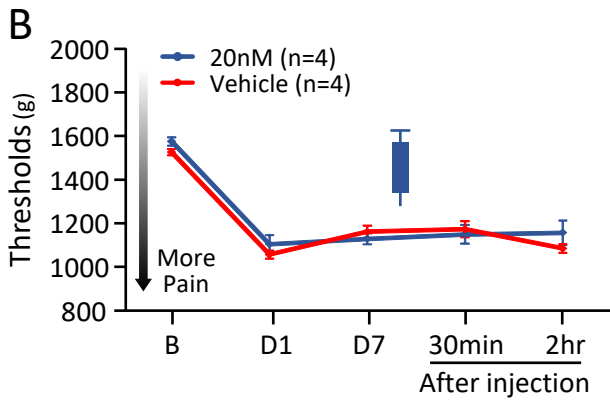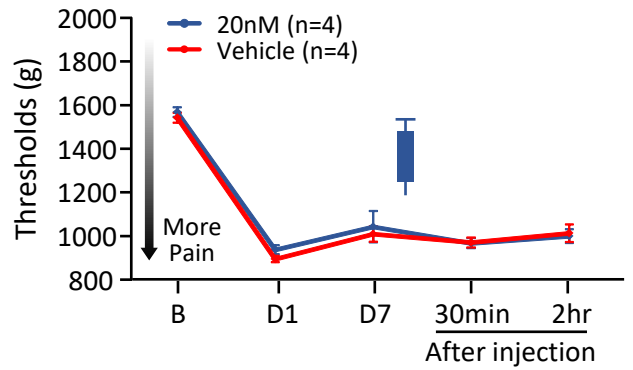

Blockade of Caspase-1

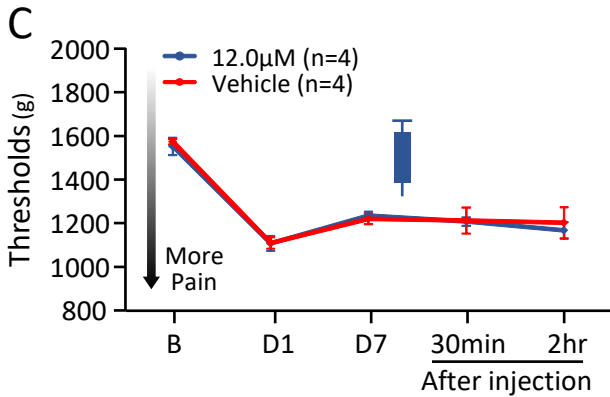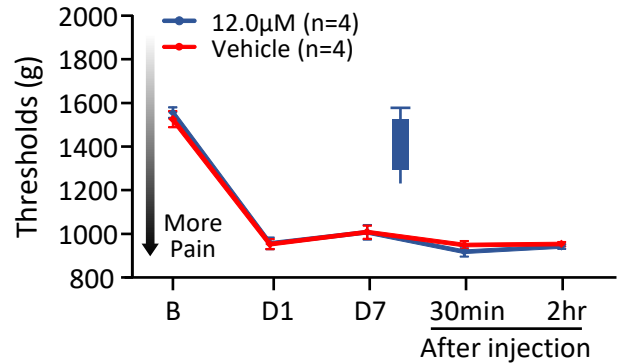

Blockade of IL-1β

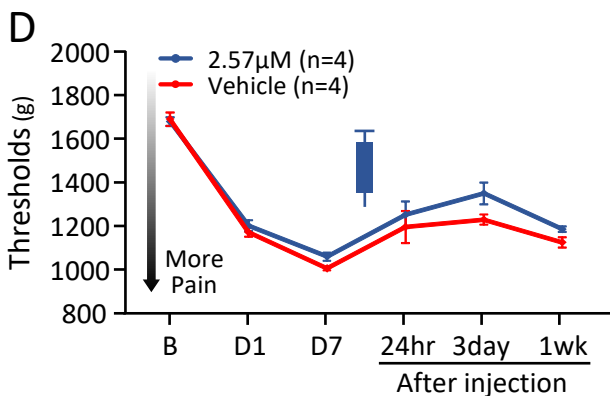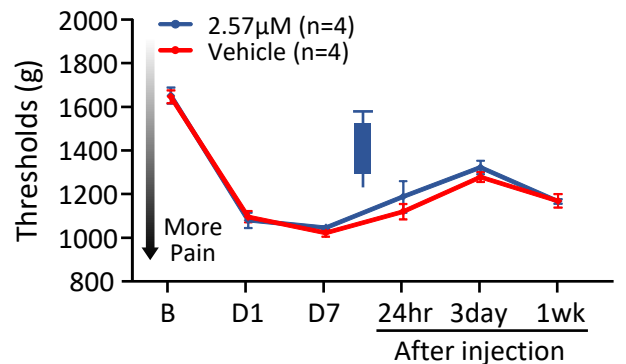

Male

Female

Blockade of P2X7

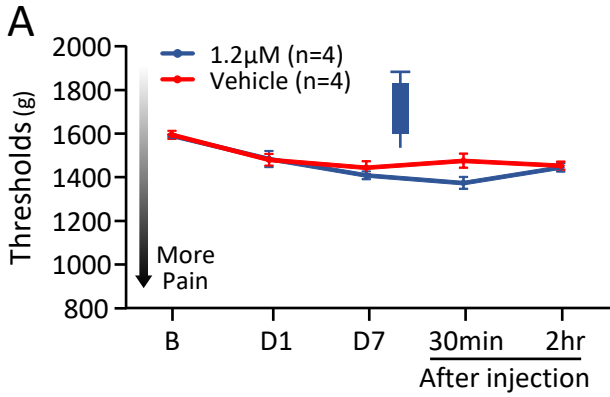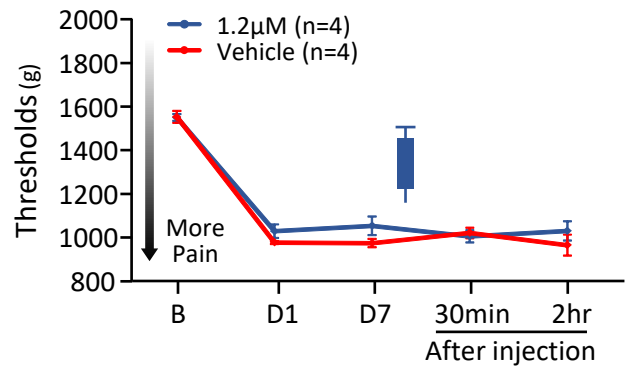

Blockade of NLRP3

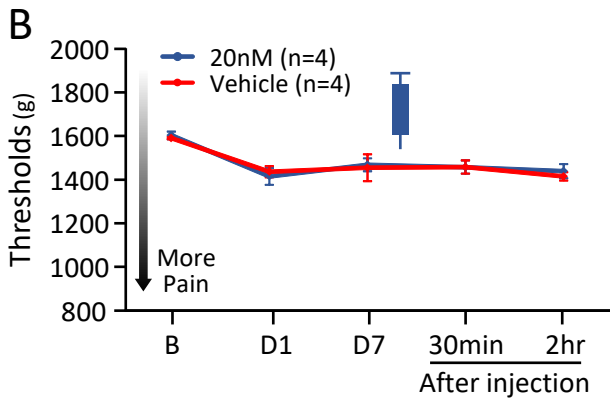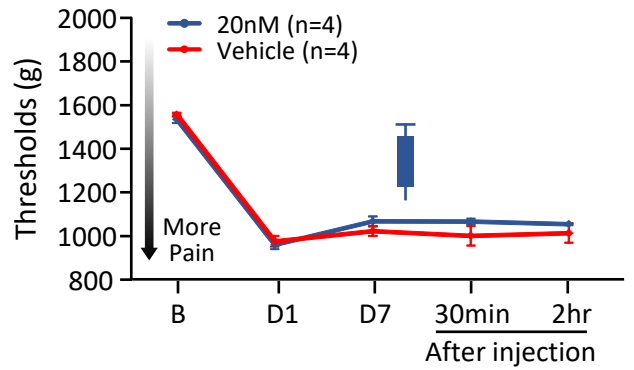

Blockade of Caspase-1

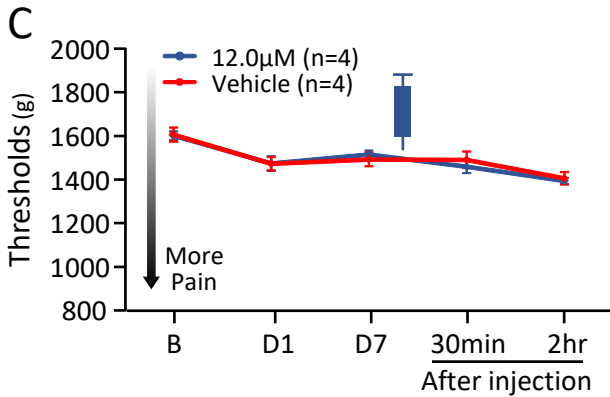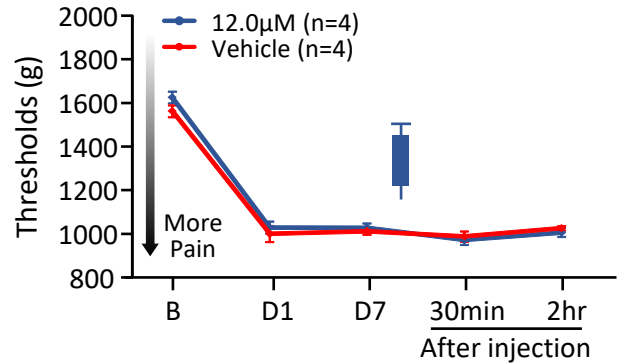

Blockade of IL-1β

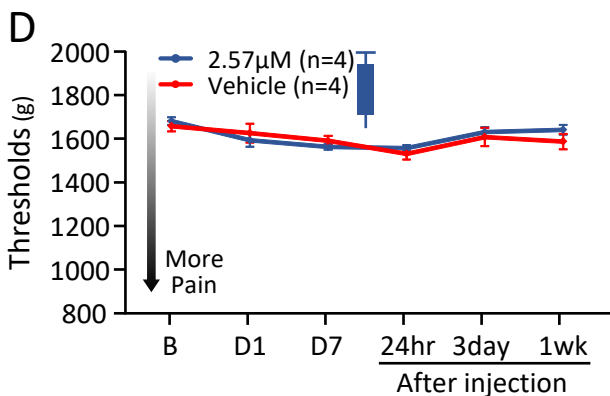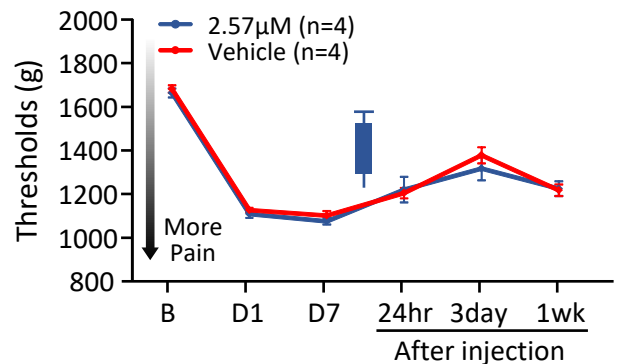

Supple Figure 5

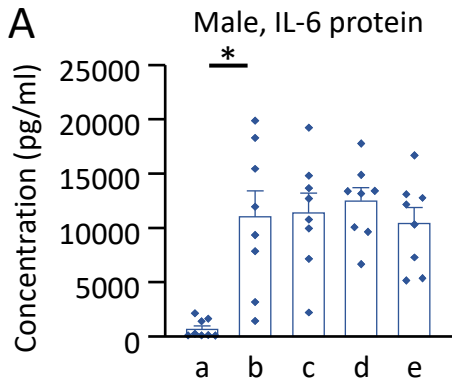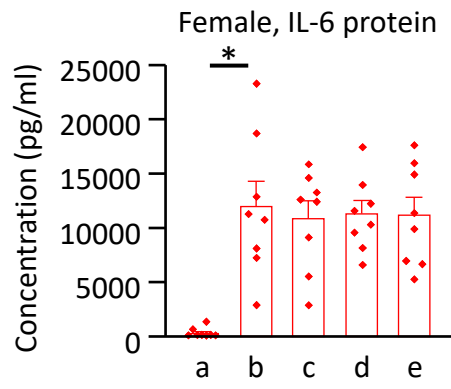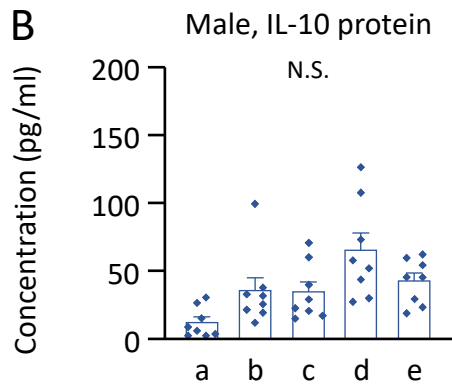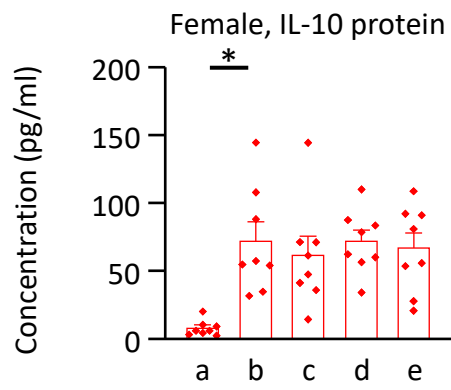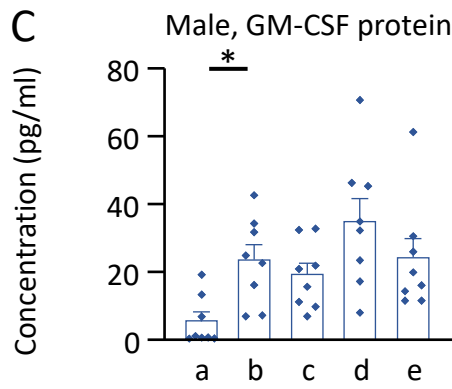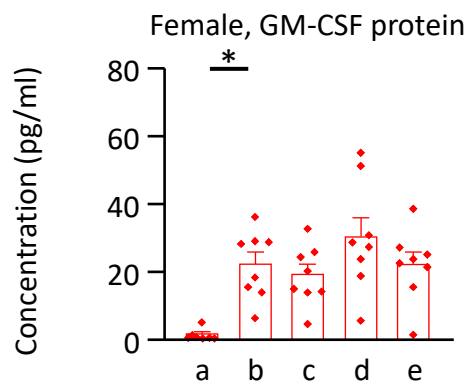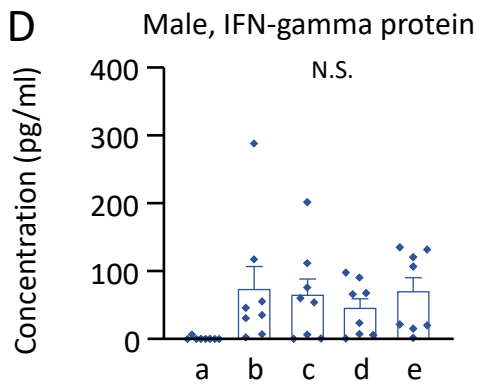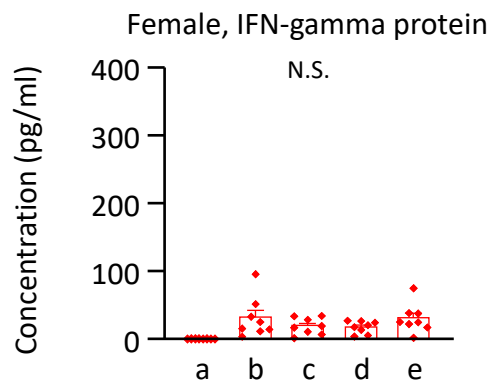

Supple Figure 5

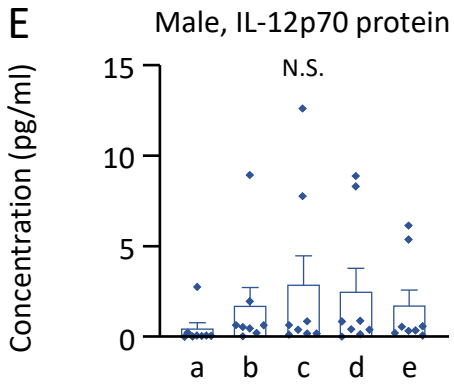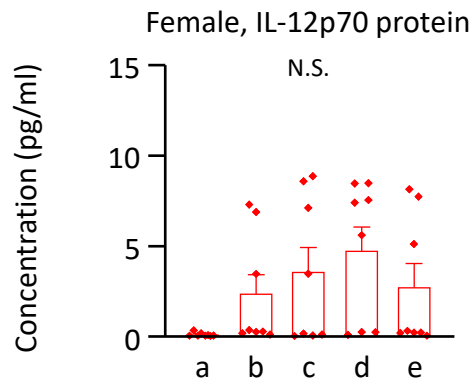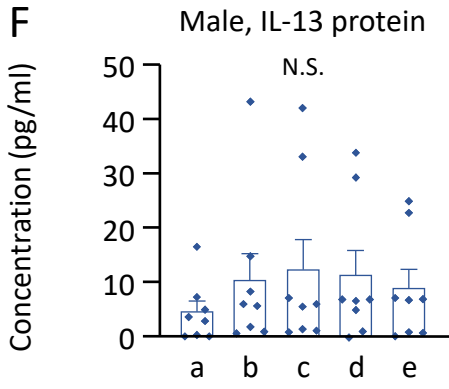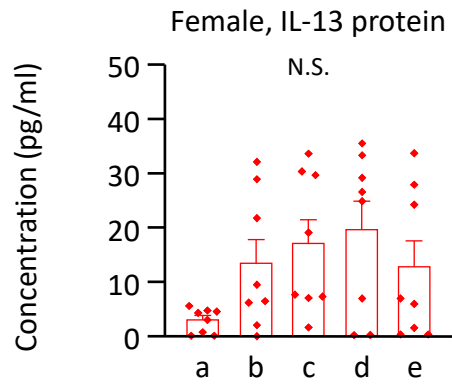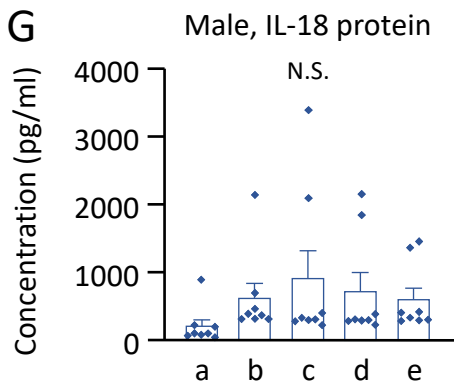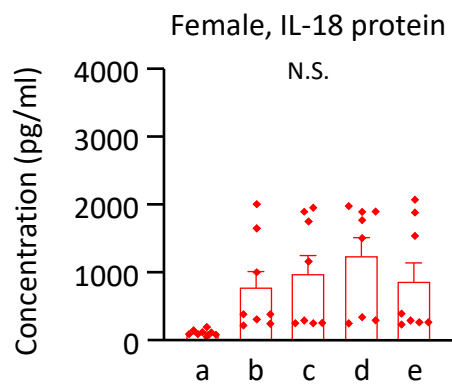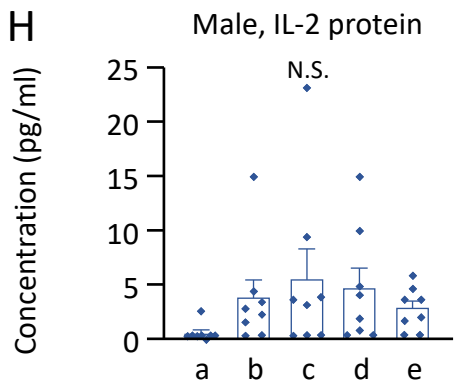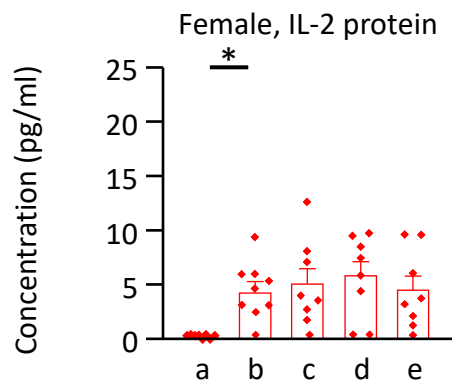

Supple Figure 5

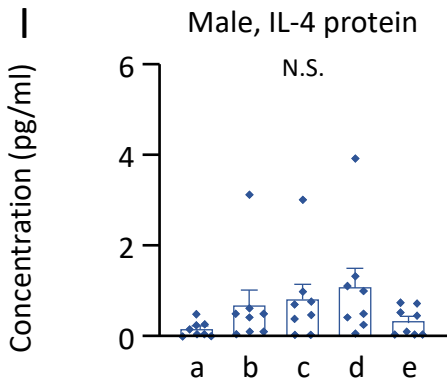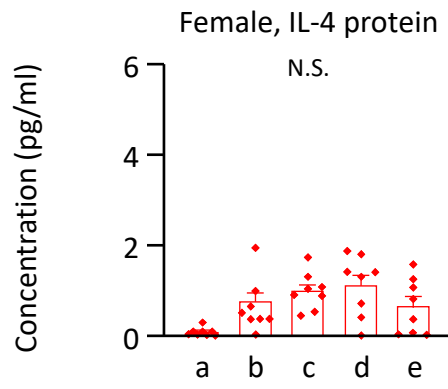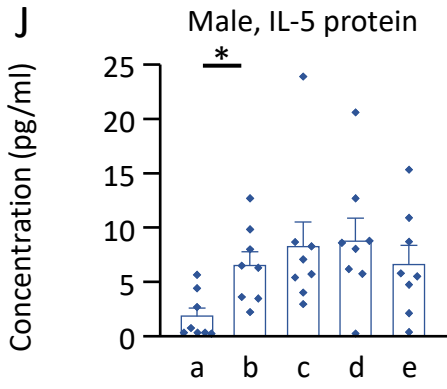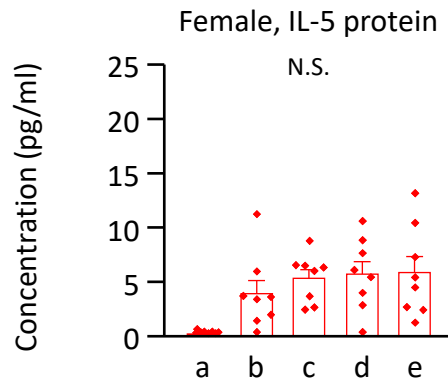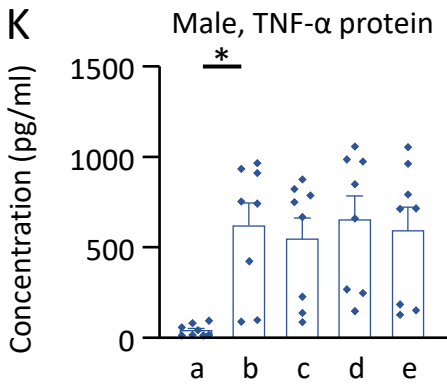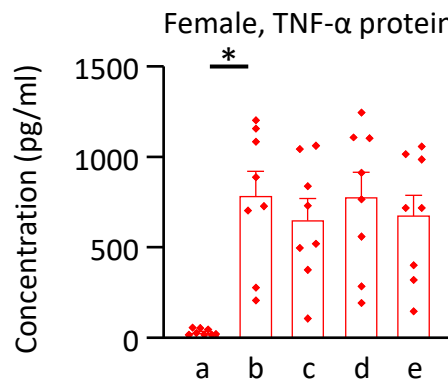

Supplement: NIHMS1871457-supplement-Supplementary_Materials__figures__tables.pdf [file NIHMS1871457-supplement-Supplementary_Materials__figures__tables.pdf]
