# Supplementary material
Source: PubMed Central journal article supplement (PMC10363217)
Supplement: NIHMS1871457-supplement-1.pdf [file NIHMS1871457-supplement-1.pdf]

**Supplement Table 1. Results for repeated-measures analysis of variance for MWT contralaterally.**

|              |       | Effect for Group                  | Effect for Sex                       | Effect for Group*Sex              |
|--------------|-------|-----------------------------------|--------------------------------------|-----------------------------------|
| P2X7         | Prior | $F_{3,40} < 0.01$ ; $p > 0.99$    | $F_{1,40} = 370.42$ ; $p < 0.01^*$   | $F_{3,40} = 1.04$ ; $p = 0.38$    |
|              | 24hr  | $F_{1,28} = 3.40$ ; $p = 0.07$    | $F_{1,28} = 288.73$ ; $p < 0.01^*$   | $F_{1,28} = 0.67$ ; $p = 0.41$    |
|              | 1week | $F_{1,12} = 0.36$ ; $p = 0.56$    | $F_{1,12} = 277.35$ ; $p < 0.01^*$   | $F_{1,12} = 2.39$ ; $p = 0.14$    |
| NLRP3        | Prior | $F_{3,40} = 1.69$ ; $p = 0.18$    | $F_{1,40} = 1,944.37$ ; $p < 0.01^*$ | $F_{3,40} = 0.76$ ; $p = 0.52$    |
|              | 24hr  | $F_{1,28} = 0.01$ ; $p = 0.91$    | $F_{1,28} = 565.96$ ; $p < 0.01^*$   | $F_{1,28} < 0.01$ ; $p = 0.97$    |
|              | 1week | $F_{1,12} = 1.47$ ; $p = 0.24$    | $F_{1,12} = 235.29$ ; $p < 0.01^*$   | $F_{1,12} = 0.60$ ; $p = 0.45$    |
| Caspase-1    | Prior | $F_{3,40} = 0.34$ ; $p = 0.79$    | $F_{1,40} = 556.98$ ; $p < 0.01^*$   | $F_{3,40} = 0.88$ ; $p = 0.45$    |
|              | 24hr  | $F_{1,28} = 0.04$ ; $p = 0.84$    | $F_{1,28} = 788.79$ ; $p < 0.01^*$   | $F_{1,28} = 3.02$ ; $p = 0.09$    |
|              | 1week | $F_{1,12} = 0.83$ ; $p = 0.37$    | $F_{1,12} = 409.78$ ; $p < 0.01^*$   | $F_{1,12} = 0.01$ ; $p = 0.92$    |
| IL-1 $\beta$ | Prior | $F_{1,22} = 26.34$ ; $p < 0.01^*$ | $F_{1,22} = 649.87$ ; $p < 0.01^*$   | $F_{1,22} = 22.58$ ; $p < 0.01^*$ |
|              | 24hr  | $F_{1,28} = 4.50$ ; $p = 0.04^*$  | $F_{1,28} = 10.01$ ; $p < 0.01^*$    | $F_{1,28} = 1.81$ ; $p = 0.18$    |
|              | 1week | $F_{1,12} = 0.15$ ; $p = 0.70$    | $F_{1,12} = 146.10$ ; $p < 0.01^*$   | $F_{1,12} = 0.71$ ; $p = 0.41$    |

\*,  $p < 0.05$  with a repeated measures ANOVA.

**Supplement Table 2. Results for repeated-measures analysis of variance for cytokine expression of LPS-primed macrophages.**

|                  | Effect for Group                  | Effect for Sex                  | Effect for Group*Sex            |
|------------------|-----------------------------------|---------------------------------|---------------------------------|
| IL-6 protein     | F <sub>4,56</sub> =30.38; p<0.01* | F <sub>1,14</sub> <0.01; p=0.96 | F <sub>4,56</sub> =0.26; p=0.90 |
| IL-10 protein    | F <sub>4,56</sub> =16.29; p<0.01* | F <sub>1,14</sub> =3.49; p=0.08 | F <sub>4,56</sub> =2.27; p=0.07 |
| GM-CSF protein   | F <sub>4,56</sub> =17.83; p<0.01* | F <sub>1,14</sub> =0.31; p=0.58 | F <sub>4,56</sub> =0.14; p=0.96 |
| IFN-γ protein    | F <sub>4,56</sub> =5.55; p<0.01*  | F <sub>1,14</sub> =3.75; p=0.07 | F <sub>4,56</sub> =1.04; p=0.39 |
| IL-12p70 protein | F <sub>4,56</sub> =2.27; p=0.07   | F <sub>1,14</sub> =3.31; p=0.09 | F <sub>4,56</sub> =0.28; p=0.88 |
| IL-13 protein    | F <sub>4,56</sub> =2.12; p=0.08   | F <sub>1,14</sub> =3.37; p=0.08 | F <sub>4,56</sub> =0.32; p=0.86 |
| IL-18 protein    | F <sub>4,56</sub> =2.96; p=0.02*  | F <sub>1,14</sub> =2.43; p=0.14 | F <sub>4,56</sub> =0.36; p=0.83 |
| IL-2 protein     | F <sub>4,56</sub> =3.53; p=0.01*  | F <sub>1,14</sub> =0.41; p=0.52 | F <sub>4,56</sub> =0.19; p=0.93 |
| IL-4 protein     | F <sub>4,56</sub> =4.96; p<0.01*  | F <sub>1,14</sub> =0.32; p=0.57 | F <sub>4,56</sub> =0.22; p=0.92 |
| IL-5 protein     | F <sub>4,56</sub> =7.18; p<0.01*  | F <sub>1,14</sub> =3.78; p=0.07 | F <sub>4,56</sub> =0.27; p=0.89 |
| TNF-α protein    | F <sub>4,56</sub> =29.62; p<0.01* | F <sub>1,14</sub> =0.48; p=0.49 | F <sub>4,56</sub> =0.39; p=0.80 |

\*, p<0.05 with a repeated measures ANOVA.
